# Supplementary material
Source: PubMed Central journal article supplement (PMC9264454)
Supplement: HESR-57-734-s001.pdf [file HESR-57-734-s001.pdf]

# Feedback Report on the CLC Partnership and Documented Life-Sustaining Treatment Decisions in the CLC

VAMC

March, 2020

The following pages present data about the number of completed LST templates for Veterans at the VAMC.

Please review these charts to encourage reflection on your current practice and how VAMC might increase the number of goals of care conversations (GoCCs) and completed LST order templates.

To better understand the data, please keep in mind these points:

- Data are collected monthly.
- Data are displayed for all Veterans residing in your CLC, including those Veterans diagnosed with dementia, month by month.
- Veterans are defined as either long stay or short stay residents, based on their earliest treating specialty at admission in a given month; those admitted for hospice are counted as long stay residents
- Data comes from the LST template in CPRS. Only templates with answers for all 4 required questions were counted.
- If a Veteran had more than one LST template completed in a month, only the first template was counted.
- Each Veteran was counted only once even if they had multiple stays.

More information about the LSTDI and its implementation is available at: <http://www.ethics.va.gov/LST.asp>.

Thank you for your efforts to conduct GoCCs and complete LST templates with Veterans and their families in VAMC to improve care and the quality of life for our Veterans.

How many total long-term residents  
have a completed LST template?  
VAMC CLC Sep 2019 – Feb 2020

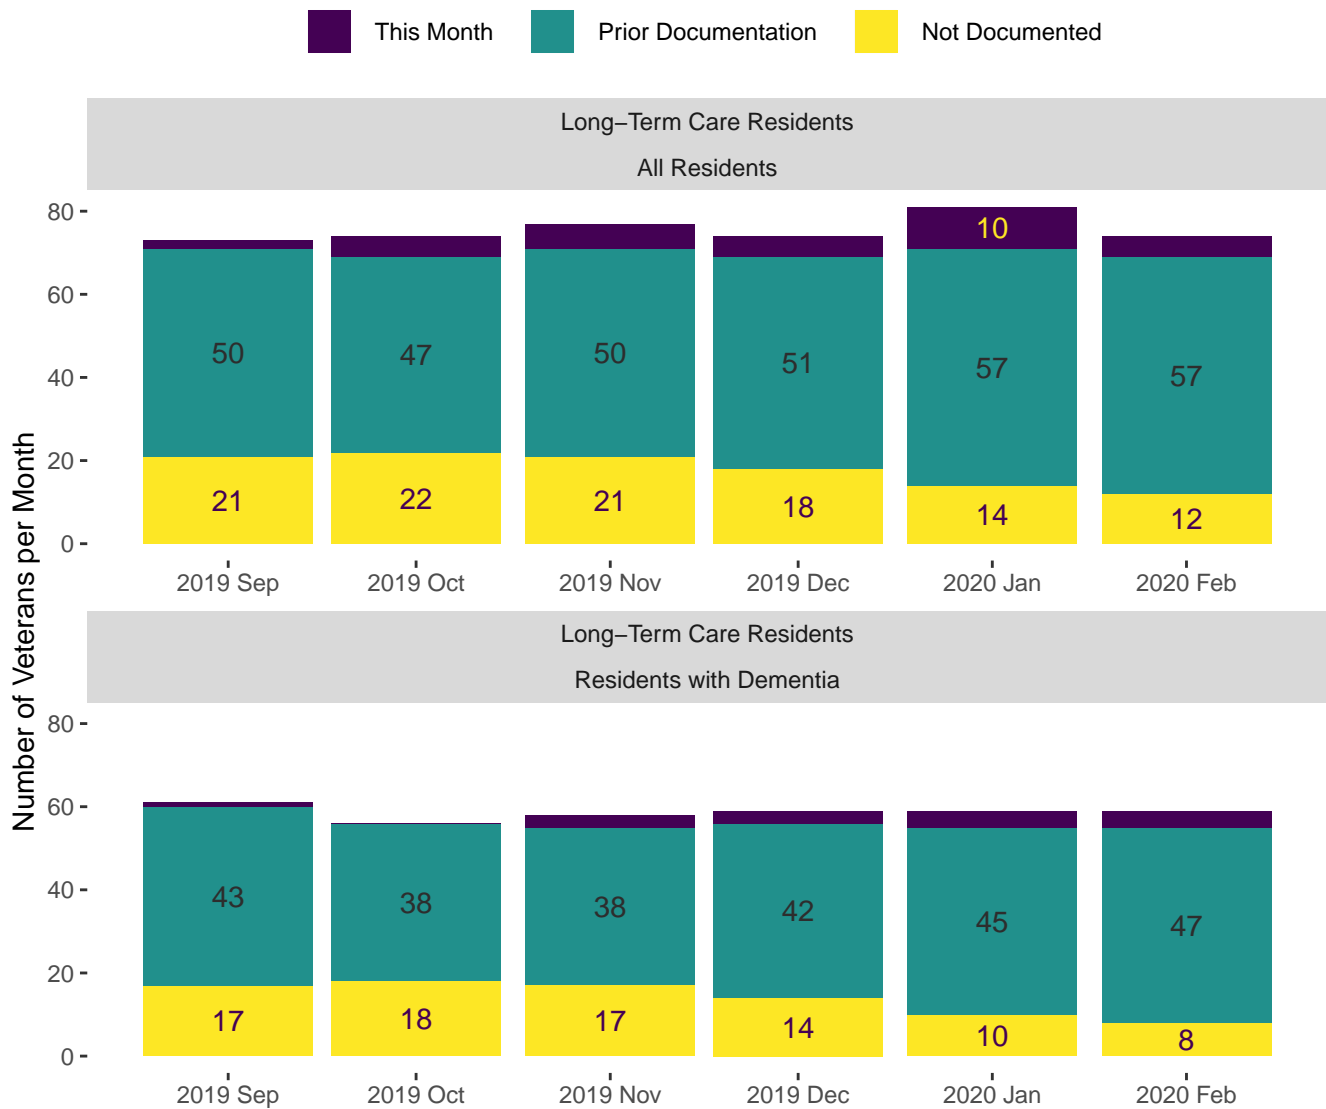

How many total short-stay patients  
have a completed LST template?  
VAMC CLC Sep 2019 – Feb 2020

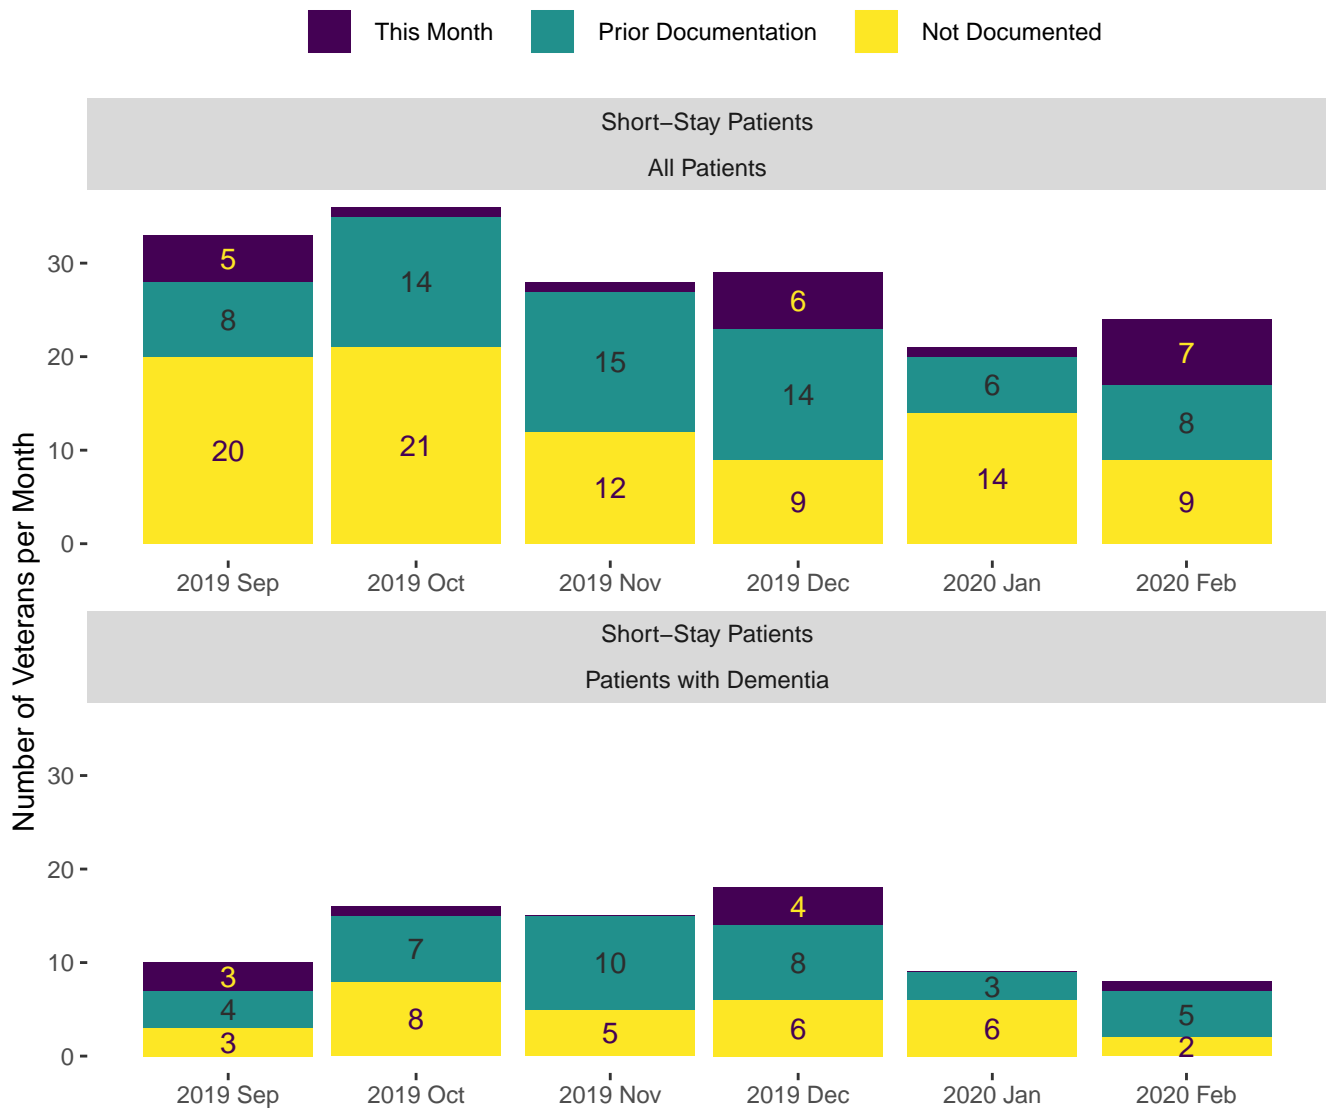

Table 1: LTC + Short Stay LST complete counts

| Count Category                                           | 2019 Sep | 2019 Oct | 2019 Nov | 2019 Dec | 2020 Jan | 2020 Feb |
|----------------------------------------------------------|----------|----------|----------|----------|----------|----------|
| <b>Long-Term Care Residents: All Residents</b>           |          |          |          |          |          |          |
| Number with new LST this month                           | 2        | 5        | 6        | 5        | 10       | 5        |
| Number with existing LST this month                      | 50       | 47       | 50       | 51       | 57       | 57       |
| Number with any LST                                      | 52       | 52       | 56       | 56       | 67       | 62       |
| Total number residents                                   | 73       | 74       | 77       | 74       | 81       | 74       |
| <b>Long-Term Care Residents: Residents with Dementia</b> |          |          |          |          |          |          |
| Number with new LST this month                           | 1        | 0        | 3        | 3        | 4        | 4        |
| Number with existing LST this month                      | 43       | 38       | 38       | 42       | 45       | 47       |
| Number with any LST                                      | 44       | 38       | 41       | 45       | 49       | 51       |
| Total number residents                                   | 61       | 56       | 58       | 59       | 59       | 59       |
| <b>Short-Stay Patients: All Patients</b>                 |          |          |          |          |          |          |
| Number with new LST this month                           | 5        | 1        | 1        | 6        | 1        | 7        |
| Number with existing LST this month                      | 8        | 14       | 15       | 14       | 6        | 8        |
| Number with any LST                                      | 13       | 15       | 16       | 20       | 7        | 15       |
| Total number patients                                    | 33       | 36       | 28       | 29       | 21       | 24       |
| <b>Short-Stay Patients: Patients with Dementia</b>       |          |          |          |          |          |          |
| Number with new LST this month                           | 3        | 1        | 0        | 4        | 0        | 1        |
| Number with existing LST this month                      | 4        | 7        | 10       | 8        | 3        | 5        |
| Number with any LST                                      | 7        | 8        | 10       | 12       | 3        | 6        |
| Total number patients                                    | 10       | 16       | 15       | 18       | 9        | 8        |
